# Supplementary material for: Pathobiological features of a novel, highly pathogenic avian influenza A(H5N8) virus
Source: PubMed Central journal article supplement — Emerg Microbes Infect. 2014 Oct 22;3(10):e75–. doi: 10.1038/emi.2014.75 (PMC4217095; doi:10.1038/emi.2014.75), 2014-10-22
Supplement: emi201475x1.pdf [file emi201475x1.pdf]

1 **Supplementary Table S1 Alignment of the internal gene nucleotide sequences of influenza strains.**

| Gene       | Dk/k1203(H5N8)          | Dk/1111(H5N2) | Dk/1-15(H4N2) | En/28(H11N9) | BDk/Gochang1(H5N8) | BTI/Donglim3(H5N8) |
|------------|-------------------------|---------------|---------------|--------------|--------------------|--------------------|
| <b>PB2</b> | <b>98.9<sup>a</sup></b> | 95.7          | 96            | 87.6         | 87                 | <b>100</b>         |
| <b>PB1</b> | 94.7                    | <b>98.5</b>   | <b>98.6</b>   | 92.3         | 93.8               | <b>99.9</b>        |
| <b>PA</b>  | 95.6                    | <b>98.1</b>   | <b>98.3</b>   | 93.3         | 96                 | <b>99.9</b>        |
| <b>NP</b>  | <b>98.6</b>             | 95.7          | 95.7          | 92.2         | 97.7               | <b>99.9</b>        |
| <b>M</b>   | 97.6                    | <b>99.1</b>   | <b>99.1</b>   | 92           | 96.7               | <b>99.8</b>        |
| <b>NS</b>  | 89.9                    | <b>98.8</b>   | <b>98.7</b>   | 94.9         | 93.9               | <b>99.9</b>        |

2 Abbreviations: Dk/k1203(H5N8), A/duck/Jiangsu/k1203/2010(H5N8); Dk/1111(H5N2), A/duck/Eastern

3 China/1111/2011(H5N2); Dk/1-15(H4N2), A/duck/Jiangsu/1-15/2011(H4N2); En/28(H11N9),

4 A/environment/Jiangxi/28/2009(H11N9); BDk/Gochang1(H5N8), A/broiler duck/Korea/Gochang1/2014(H5N8);

5 BTI/Donglim3(H5N8), A/Baikal teal/Korea/Donglim3/2014(H5N8).

6 <sup>a</sup>Percentage homologies based on coding sequences of MDk/W452(H5N8), A/mallard duck/Korea/W452/2014(H5N8).

7
