# Supplementary material for: Pathobiological features of a novel, highly pathogenic avian influenza A(H5N8) virus
Source: PubMed Central journal article supplement — Emerg Microbes Infect. 2014 Oct 22;3(10):e75–. doi: 10.1038/emi.2014.75 (PMC4217095; doi:10.1038/emi.2014.75), 2014-10-22
Supplement: emi201475x2.pdf [file emi201475x2.pdf]

**Supplementary Table S2 Molecular characterization of influenza strains based on amino acid sequences.**

| Virus Name                   | HA <sup>a</sup> |     |     |     |     |     |     |     |     | NA <sup>b</sup> |     | PB2 |     |     |     |     | PB1-F2 | M2 | NS1                   |             |
|------------------------------|-----------------|-----|-----|-----|-----|-----|-----|-----|-----|-----------------|-----|-----|-----|-----|-----|-----|--------|----|-----------------------|-------------|
|                              | Cleavage Site   | 158 | 193 | 222 | 224 | 226 | 227 | 228 | 318 | 274             | 292 | 158 | 271 | 591 | 627 | 701 | 66S    | 31 | Deletion <sup>c</sup> | C-terminal  |
| <b>En/W149(H5N1)</b>         | GERRRKKR/GLF    | N   | K   | K   | N   | Q   | S   | G   | T   | H               | R   | E   | T   | Q   | K   | D   | N      | S  | YES                   | ESKV        |
| <b>Dk/k1203/10(H5N8)</b>     | REKRR_KR/GLF    | N   | N   | Q   | N   | Q   | R   | G   | T   | H               | R   | E   | T   | Q   | E   | D   | S      | N  | YES                   | EPEV        |
| <b>En/W401(H5N1)</b>         | RERRR_KR/GLF    | D   | R   | K   | N   | Q   | S   | G   | T   | H               | R   | E   | T   | Q   | E   | D   | N      | S  | YES                   | ESEV        |
| <b>Dk/1111(H5N2)</b>         | REKRR_KR/GLF    | N   | N   | Q   | N   | Q   | R   | G   | T   | H               | R   | E   | T   | Q   | E   | D   | S      | N  | NO                    | ESEV        |
| <b>Dk1-15(H4N2)</b>          | PEKA__SR/GLF    | D   | N   | W   | R   | Q   | S   | G   | T   | H               | R   | E   | T   | Q   | E   | D   | S      | N  | NO                    | ESEV        |
| <b>MDk/W452(H5N8)</b>        | REKRR_KR/GLF    | N   | N   | Q   | N   | Q   | R   | G   | T   | H               | R   | E   | T   | Q   | E   | D   | S      | N  | NO                    | ESEVRGNKMAD |
| <b>BDk/Gochang1(H5N8)</b>    | REKRR_KR/GLF    | N   | N   | Q   | N   | Q   | R   | G   | T   | H               | R   | E   | T   | Q   | E   | D   | No     | N  | NO                    | ESEV        |
| <b>BTI/Donglim3/14(H5N8)</b> | REKRR_KR/GLF    | N   | N   | Q   | N   | Q   | R   | G   | T   | H               | R   | E   | T   | Q   | E   | D   | S      | N  | NO                    | ESEVRGNKMAD |

Deduced amino sequences were used to compare and examine known virulence markers and pathogenicity determinants.

<sup>a</sup>H3 numbering.

<sup>b</sup>N2 numbering.

<sup>c</sup>Presence or absence of deletion at positions 80-84.
