# Supplementary material for: Pathobiological features of a novel, highly pathogenic avian influenza A(H5N8) virus
Source: PubMed Central journal article supplement — Emerg Microbes Infect. 2014 Oct 22;3(10):e75–. doi: 10.1038/emi.2014.75 (PMC4217095; doi:10.1038/emi.2014.75), 2014-10-22
Supplement: emi201475x3.pdf [file emi201475x3.pdf]

1 **Supplementary Table S3 Biological properties of HPAI H5 viruses.**

| Virus Name                | H5 Clade | Biological characteristics |                    |                     |                     |      | Transmission      |         |      |
|---------------------------|----------|----------------------------|--------------------|---------------------|---------------------|------|-------------------|---------|------|
|                           |          | EID <sub>50</sub>          | TCID <sub>50</sub> | Ck LD <sub>50</sub> | Dk LD <sub>50</sub> | IVPI | MLD <sub>50</sub> | Chicken | Duck |
| <b>En/W149(H5N1)</b>      | 2.2      | 8.3                        | 8.6                | 2.3                 | 2.5                 | 3.0  | 3.2               | 6/6     | 6/6  |
| <b>Mdk/W401(H5N1)</b>     | 2.3.2.1  | 8.3                        | 6.3                | 3                   | 5.3                 | 2.7  | 2.6               | 6/6     | 6/6  |
| <b>MDk/W452(H5N8)</b>     | 2.3.4.6  | 8.9                        | 6.9                | 2.5                 | ≥ 6.0               | 3    | 5.8               | 6/6     | 6/6  |
| <b>BDk/Gochang1(H5N8)</b> | 2.3.4.6  | N/A                        | N/A                | N/A                 | N/A                 | 3*   | N/A               | N/A     | N/A  |
| <b>BTI/Donglim3(H5N8)</b> | 2.3.4.6  | N/A                        | N/A                | N/A                 | N/A                 | 3*   | N/A               | N/A     | N/A  |

2 All values are expressed as log<sub>10</sub>: EID<sub>50</sub>, 50% egg infectious dose; TCID<sub>50</sub>, 50% tissue culture infectious dose; Ck LD<sub>50</sub>, 50%

3 lethal dose in chicken; Dk LD<sub>50</sub>, 50% lethal dose in duck; IVPI, intravenous pathogenic index determined in chickens;

4 MLD<sub>50</sub>, 50% lethal dose in mice. N/A, not applicable.

5 \*As reported by Lee et al (2014).

6
