# Supplementary material for: Pathobiological features of a novel, highly pathogenic avian influenza A(H5N8) virus
Source: PubMed Central journal article supplement — Emerg Microbes Infect. 2014 Oct 22;3(10):e75–. doi: 10.1038/emi.2014.75 (PMC4217095; doi:10.1038/emi.2014.75), 2014-10-22
Supplement: emi201475x4.pdf [file emi201475x4.pdf]

1 **Supplementary Table S4 Virus sensitivity to NA inhibitor compounds in vitro.**

| Compound                                   | IC <sub>50</sub> value <sup>a</sup> |               |                |                                           |
|--------------------------------------------|-------------------------------------|---------------|----------------|-------------------------------------------|
|                                            | MDk/W452(H5N8)                      | En/W149(H5N1) | MDk/W401(H5N1) | CA/04(H1N1) <sub>H274Y</sub> <sup>c</sup> |
| <b>Oseltamivir carboxylate<sup>b</sup></b> | 2.01                                | 0.65          | 1.88           | 86.54                                     |
| <b>Peramivir</b>                           | 0.28                                | 0.37          | 0.85           | 9.56                                      |
| <b>Zanamivir</b>                           | 0.61                                | 0.49          | 1.26           | 0.62                                      |

2 <sup>a</sup>IC<sub>50</sub> value: mean nM of triplicate reactions.

3 <sup>b</sup>Oseltamivir carboxylate is the active form of oseltamivir.

4 <sup>c</sup>The 2009 pandemic virus CA/04(H1N1), A/California/04/2009(H1N1), was modified to contain the H274Y resistance  
5 marker in its NA gene, which served as a positive control against the NA inhibitor compounds tested.
