# Supplementary material for: Pathobiological features of a novel, highly pathogenic avian influenza A(H5N8) virus
Source: PubMed Central journal article supplement — Emerg Microbes Infect. 2014 Oct 22;3(10):e75–. doi: 10.1038/emi.2014.75 (PMC4217095; doi:10.1038/emi.2014.75), 2014-10-22
Supplement: emi201475x5.pdf [file emi201475x5.pdf]

1 **Supplementary Table S5 Replication of HPAI H5 AIVs in domestic avian poultry.**

| Host/Virus            | Viral titers (Standard deviation) |                    |                    |                   |            |
|-----------------------|-----------------------------------|--------------------|--------------------|-------------------|------------|
|                       | 1 dpi                             | 3 dpi              | 5 dpi              | 7 dpi             | 9 dpi      |
| <b><u>Chicken</u></b> |                                   |                    |                    |                   |            |
| <b>MDk/W452(H5N8)</b> | 2.3(0.3)/-                        | 3.8(0.3)/1.75(0.3) | 5.7(0.3)/2.7(0.7)  | †                 | ND         |
| <b>En/W149(H5N1)</b>  | 4.0 (0.3)/-                       | 4.0 (0.5)/2.3(0.3) | 6.0(0.5)/2.7(0.3)  | †                 | ND         |
| <b>MDk/W401(H5N1)</b> | 3.0 (0.5)/-                       | 3.3 (0.3)/1.7(0.5) | 5.5 (0.5)/2.5(0.5) | †                 | ND         |
| <b><u>Duck</u></b>    |                                   |                    |                    |                   |            |
| <b>MDk/W452(H5N8)</b> | 2.3(0.3)/-                        | 3.4(0.9)/2.3(0.7)  | 2.1(0.9)/0.5(0.5)  | -                 | -          |
| <b>En/W149(H5N1)</b>  | 5.0(0.5)/-                        | 5.3(0.5)/1.7(0.3)  | 4.5(0.5)/1.7(0.3)  | †                 | ND         |
| <b>MDk/W401(H5N1)</b> | 4.0(0.5)/-                        | 4.5(0.5)/1.3(0.3)  | 4.3(0.3)/2.3(0.3)  | 3.0(0.5)/1.3(0.3) | 1.7(0.6)/- |

2 Virus titrations were based on oropharyngeal/cloacal swab samples. Viral titers are expressed as  $\log_{10}$  50% egg  
3 infectious dose (EID<sub>50</sub>)/mL determined in 10-day-old embryonated chicken eggs and calculated by the method of Reed  
4 and Muench (1938). Abbreviations: dpi, days post-infection; ND, not determined; dash lines indicate negative for virus  
5 detection (lower limit=0.7  $\log_{10}$ EID<sub>50</sub>/mL). A dagger (†) indicates remaining infected hosts died.

6
