# Supplementary material for: Pathobiological features of a novel, highly pathogenic avian influenza A(H5N8) virus
Source: PubMed Central journal article supplement — Emerg Microbes Infect. 2014 Oct 22;3(10):e75–. doi: 10.1038/emi.2014.75 (PMC4217095; doi:10.1038/emi.2014.75), 2014-10-22
Supplement: emi201475x6.pdf [file emi201475x6.pdf]

1 **Supplementary Table S6 Seroconversion in inoculated and contact ferrets.**

| Virus          | Exposure       | Nasal wash titers ( $\log_{10}$ EID <sub>50</sub> /mL) |       |       |       |       |        |        | Seroconversion (HI titer) |
|----------------|----------------|--------------------------------------------------------|-------|-------|-------|-------|--------|--------|---------------------------|
|                |                | 1 dpi                                                  | 3 dpi | 5 dpi | 7 dpi | 9 dpi | 11 dpi | 14 dpi |                           |
| MDk/W452(H5N8) | Inoculated     | 3.0                                                    | 2     | 1.0   | -     | -     | -      | -      | 40                        |
|                | Direct contact | -                                                      | -     | -     | -     | -     | -      | -      | 40                        |
|                | RD contact     | -                                                      | -     | -     | -     | -     | -      | -      | <10                       |
|                | Inoculated     | 2.0                                                    | 2.5   | 1.0   | -     | -     | -      | -      | 80                        |
|                | Direct contact | -                                                      | -     | -     | -     | -     | -      | -      | <10                       |
|                | RD contact     | -                                                      | -     | -     | -     | -     | -      | -      | <10                       |
|                | Inoculated     | 3.0                                                    | 1.5   | 1.0   | -     | -     | -      | -      | 40                        |
|                | Direct contact | -                                                      | -     | -     | -     | -     | -      | -      | <10                       |
|                | RD contact     | -                                                      | -     | -     | -     | -     | -      | -      | <10                       |
| En/W149(H5N1)  | Inoculated     | 3.0                                                    | 5.0   | 5.5   | 3.9   | -     | -      | -      | 160                       |
|                | Direct contact | -                                                      | -     | -     | -     | -     | -      | -      | 40                        |
|                | RD contact     | -                                                      | -     | -     | -     | -     | -      | -      | <10                       |
|                | Inoculated     | 2.0                                                    | 4.5   | 5.75  | 3.25  | -     | -      | -      | 160                       |
|                | Direct contact | -                                                      | -     | -     | -     | -     | -      | -      | 80                        |
|                | RD contact     | -                                                      | -     | -     | -     | -     | -      | -      | <10                       |
|                | Inoculated     | 3.0                                                    | 5.0   | 5.25  | 3.0   | -     | -      | -      | 80                        |
|                | Direct contact | -                                                      | -     | -     | -     | -     | -      | -      | <10                       |
|                | RD contact     | -                                                      | -     | -     | -     | -     | -      | -      | <10                       |
| MDk/W401(H5N1) | Inoculated     | 2.0                                                    | 3.0   | 2.5   | -     | -     | -      | -      | 40                        |
|                | Direct contact | -                                                      | -     | -     | -     | -     | -      | -      | <10                       |
|                | RD contact     | -                                                      | -     | -     | -     | -     | -      | -      | <10                       |
|                | Inoculated     | 2.25                                                   | 3.25  | 2.0   | -     | -     | -      | -      | 40                        |
|                | Direct contact | -                                                      | -     | -     | -     | -     | -      | -      | <10                       |
|                | RD contact     | -                                                      | -     | -     | -     | -     | -      | -      | <10                       |
|                | Inoculated     | 2.0                                                    | 3.0   | 2.5   | -     | -     | -      | -      | 80                        |
|                | Direct contact | -                                                      | -     | -     | -     | -     | -      | -      | <10                       |
|                | RD contact     | -                                                      | -     | -     | -     | -     | -      | -      | <10                       |

2 Three animals were intranasally inoculated with  $10^6$  EID<sub>50</sub>/mL of virus, 500  $\mu$ l per nostril. Each inoculated animal was  
3 individually co-housed in the same cage with a seronegative direct-contact host plus a respiratory droplet (RD)-contact  
4 ferret separated by two stainless steel grill dividers. To monitor viral growth in the upper respiratory tract, nasal swabs  
5 were collected every other day from inoculated animals starting at 1 dpi and everyday from both DC- and RD-contact  
6 animals starting 1 day post-exposure. Dash line indicates no virus detected (lower limit= $0.7 \log_{10}$ EID<sub>50</sub>/mL). HI assays  
7 were conducted by using homologous virus and 0.5% chicken red blood cells. Abbreviation: dpi, day post-infection.
