# Supplementary material for: Pathobiological features of a novel, highly pathogenic avian influenza A(H5N8) virus
Source: PubMed Central journal article supplement — Emerg Microbes Infect. 2014 Oct 22;3(10):e75–. doi: 10.1038/emi.2014.75 (PMC4217095; doi:10.1038/emi.2014.75), 2014-10-22
Supplement: emi201475x7.pdf [file emi201475x7.pdf]

1 **Supplementary Table S7 Virus growth in canine and feline hosts.**

| Animal host | Exposure       | Nasal swab titers ( $\log_{10}$ EID <sub>50</sub> /mL) |       |       |       |       | Seroconversion |
|-------------|----------------|--------------------------------------------------------|-------|-------|-------|-------|----------------|
|             |                | 1 dpi                                                  | 3 dpi | 5 dpi | 7 dpi | 9 dpi | (HI titer)     |
| Dog         | Inoculated     | 1.5                                                    | -     | -     | -     | -     | <10            |
|             | Direct contact | - <sup>b</sup>                                         | -     | -     | -     | -     | <10            |
|             | Inoculated     | 2.0                                                    | -     | -     | -     | -     | 40             |
|             | Direct contact | -                                                      | -     | -     | -     | -     | <10            |
|             | Inoculated     | 2.0                                                    | -     | -     | -     | -     | 40             |
|             | Direct contact | -                                                      | -     | -     | -     | -     | <10            |
| Cat         | Inoculated     | 2.5                                                    | 3.5   | 4.5   | -     | -     | 40             |
|             | Direct contact | -                                                      | -     | -     | -     | -     | <10            |
|             | Inoculated     | 3                                                      | 5     | 2.5   | -     | -     | 40             |
|             | Direct contact | -                                                      | -     | 1     | -     | -     | <10            |
|             | Inoculated     | 2.5                                                    | 3.5   | 5     | -     | -     | 20             |
|             | Direct contact | -                                                      | -     | -     | -     | -     | <10            |

2 Three animals were intranasally inoculated with  $10^6$  EID<sub>50</sub>/mL of virus, 500  $\mu$ l per nostril. Inoculated animals were  
3 individually cohoused in the same cage with a seronegative direct-contact host. Nasal swabs were collected from  
4 inoculated and direct-contact animals every other day starting from 1 dpi for virus titration. Dash line indicates no virus  
5 detected (lower limit= $0.7 \log_{10}$ EID<sub>50</sub>/mL). HI assays were conducted by using homologous virus and 0.5% chicken red  
6 blood cells. Abbreviation: dpi, days-post-infection.
