# Supplementary material for: Pathobiological features of a novel, highly pathogenic avian influenza A(H5N8) virus
Source: PubMed Central journal article supplement — Emerg Microbes Infect. 2014 Oct 22;3(10):e75–. doi: 10.1038/emi.2014.75 (PMC4217095; doi:10.1038/emi.2014.75), 2014-10-22
Supplement: emi201475x8.pdf [file emi201475x8.pdf]

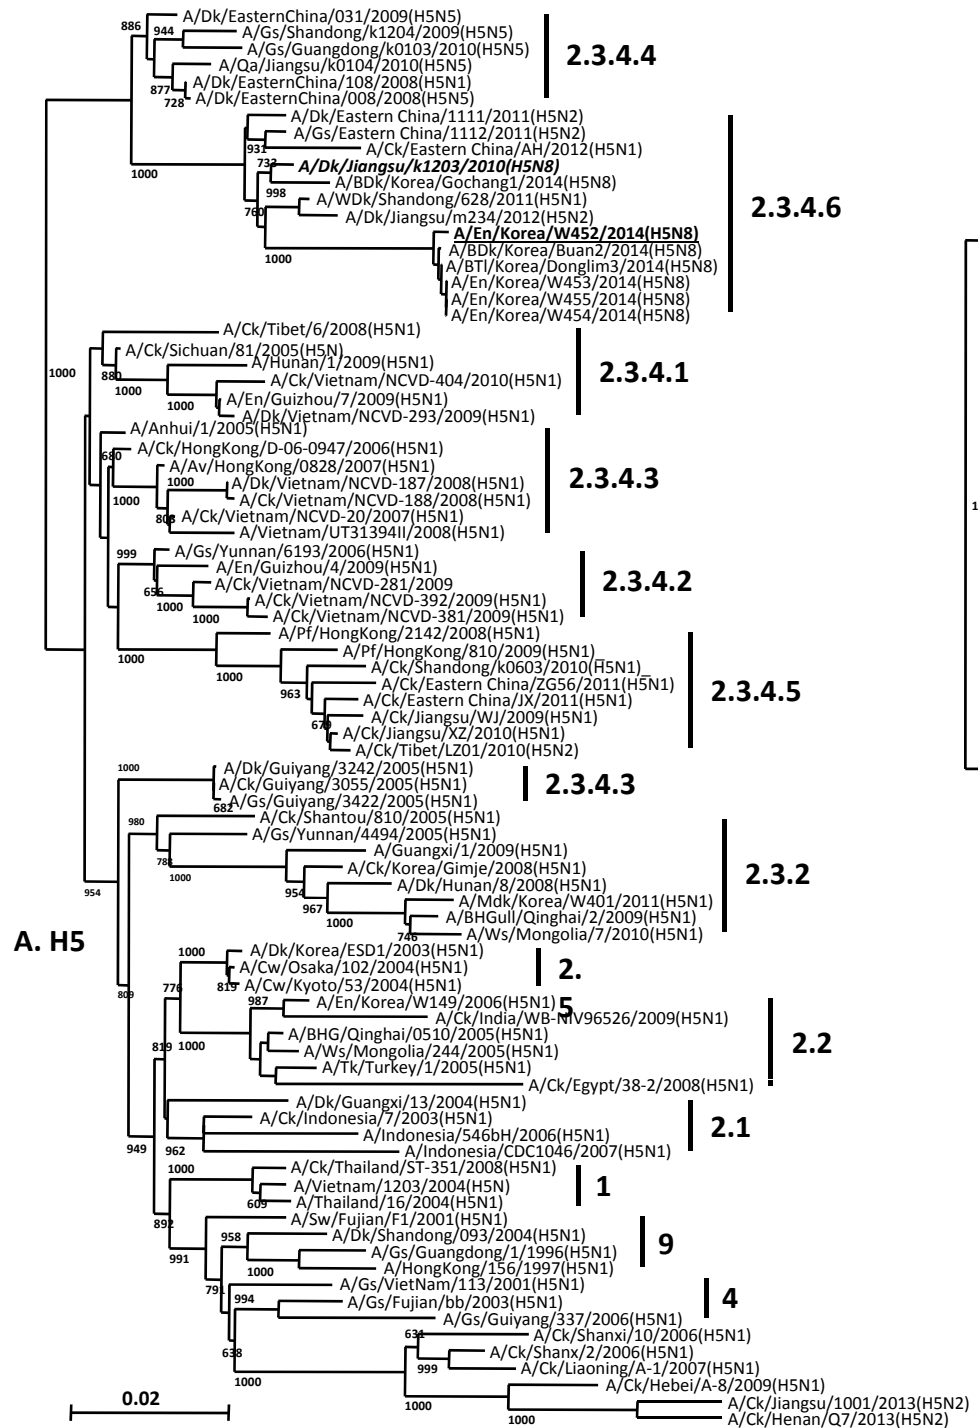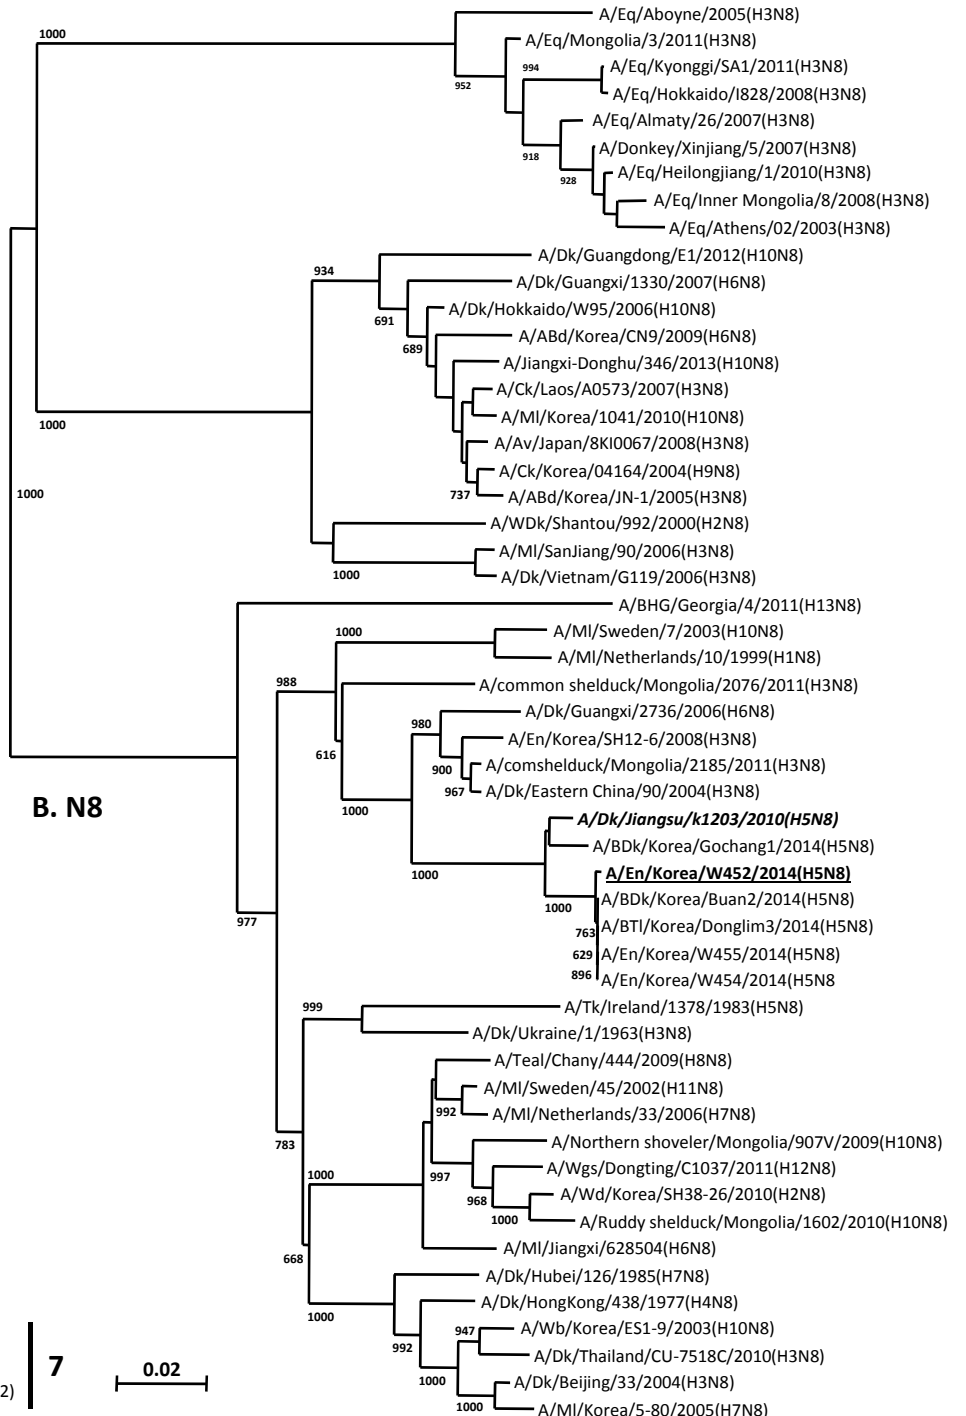

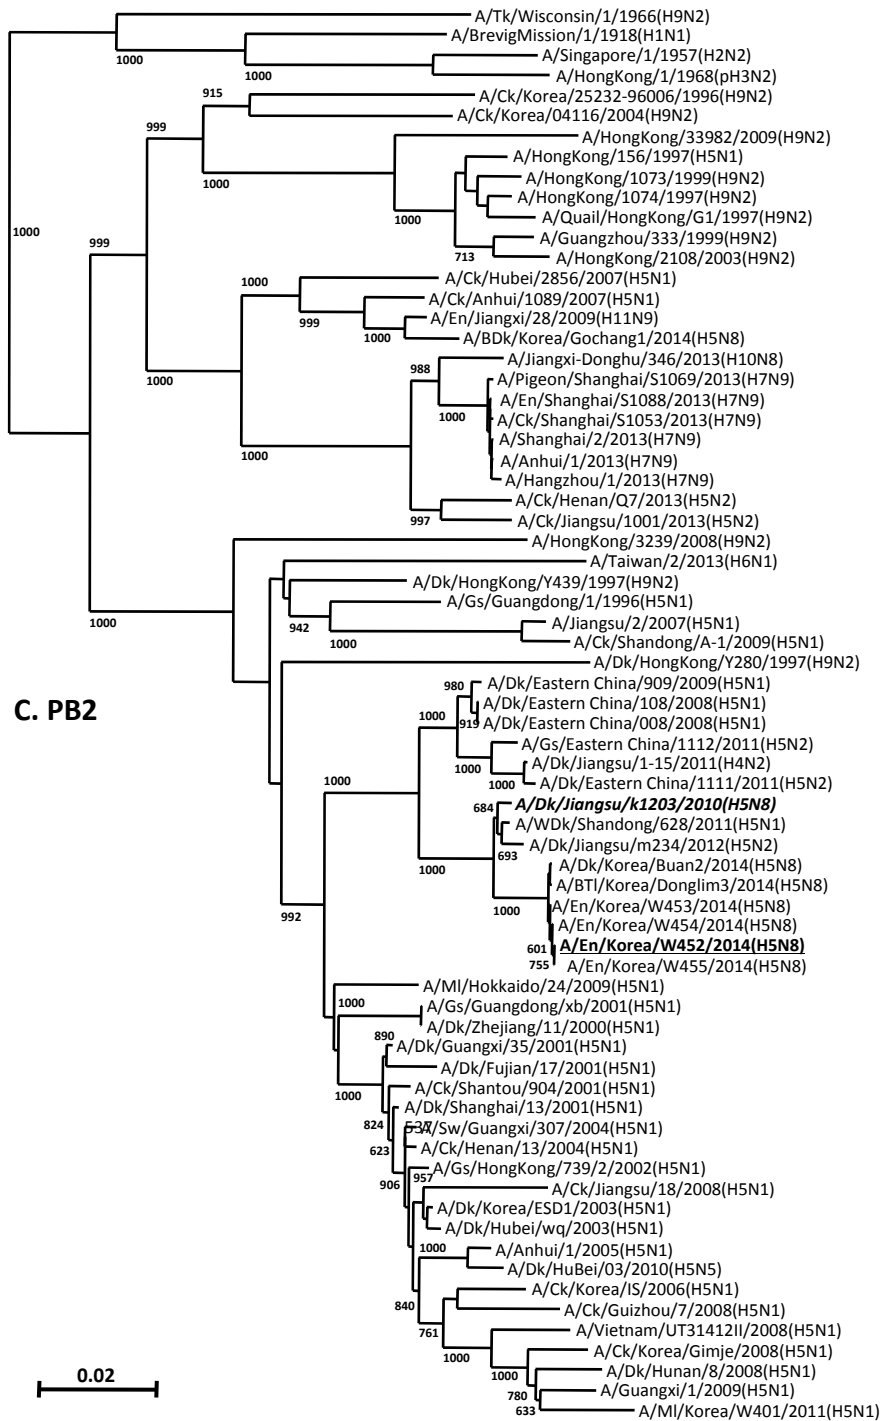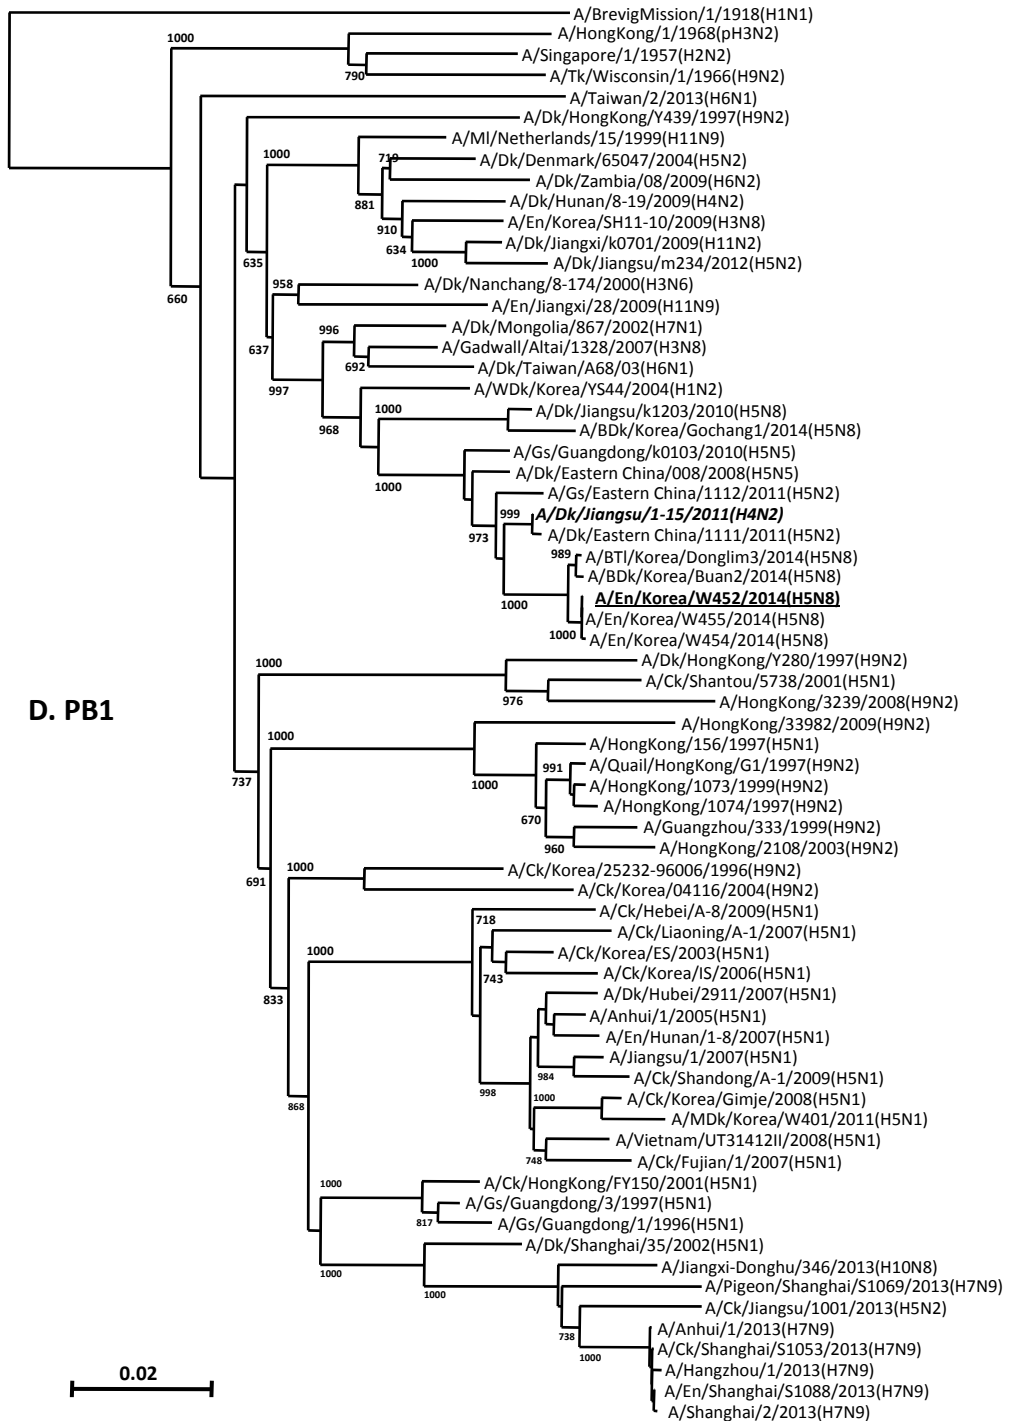

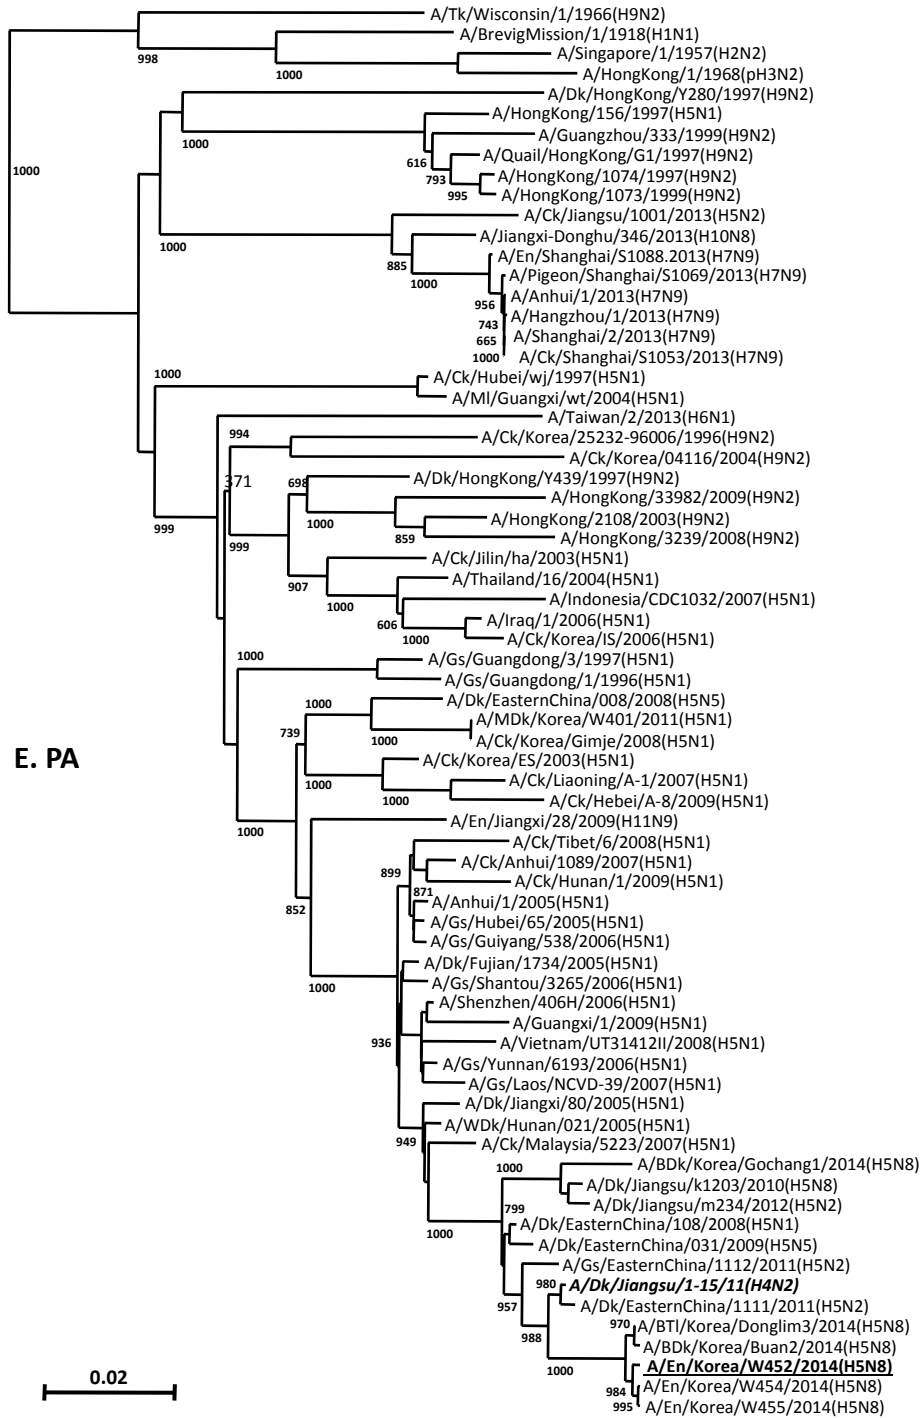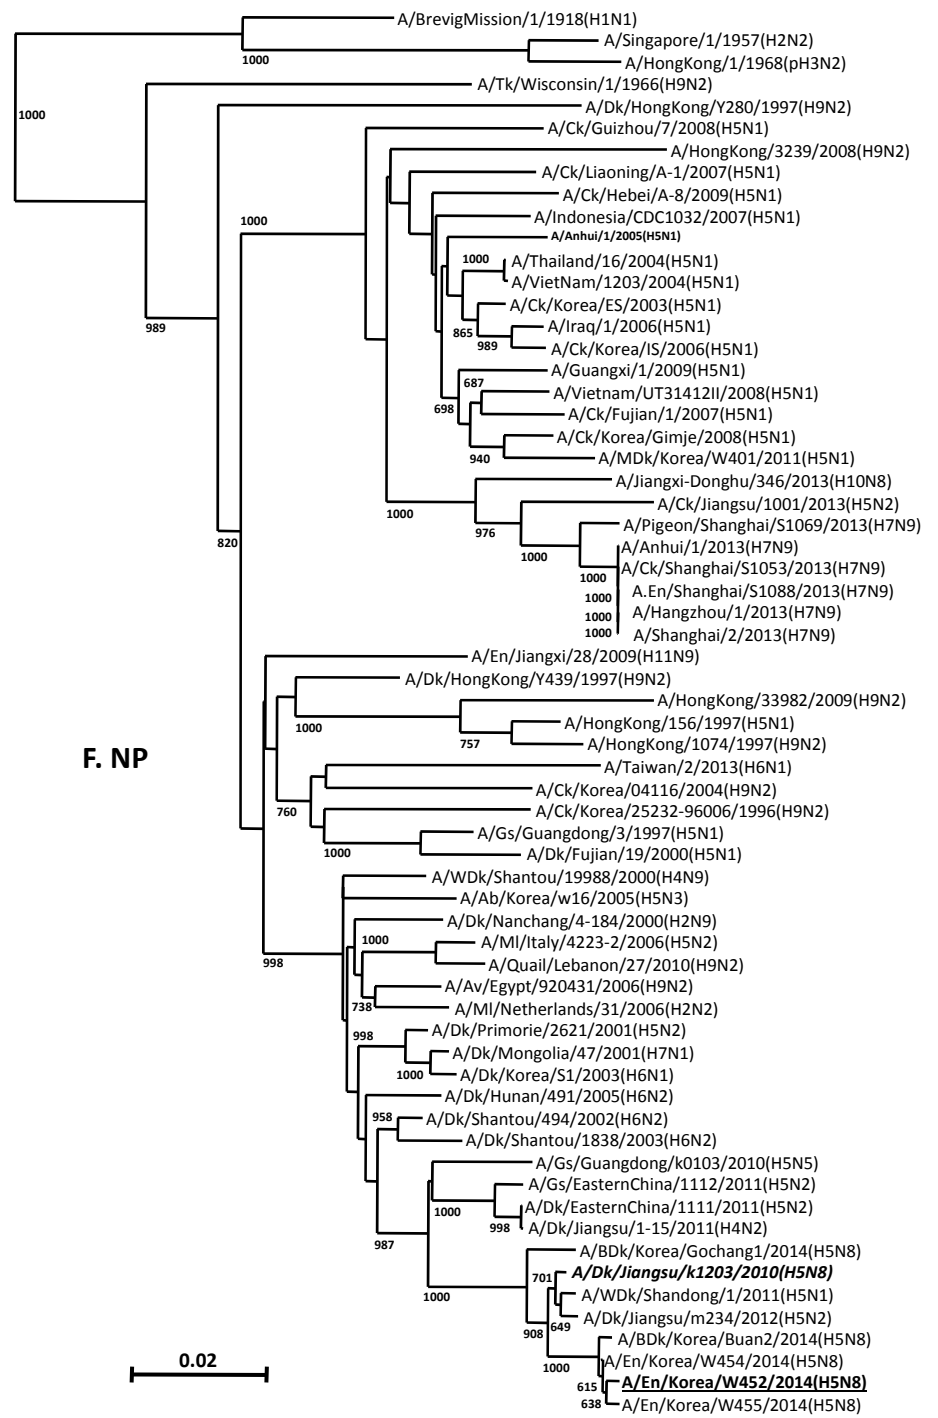

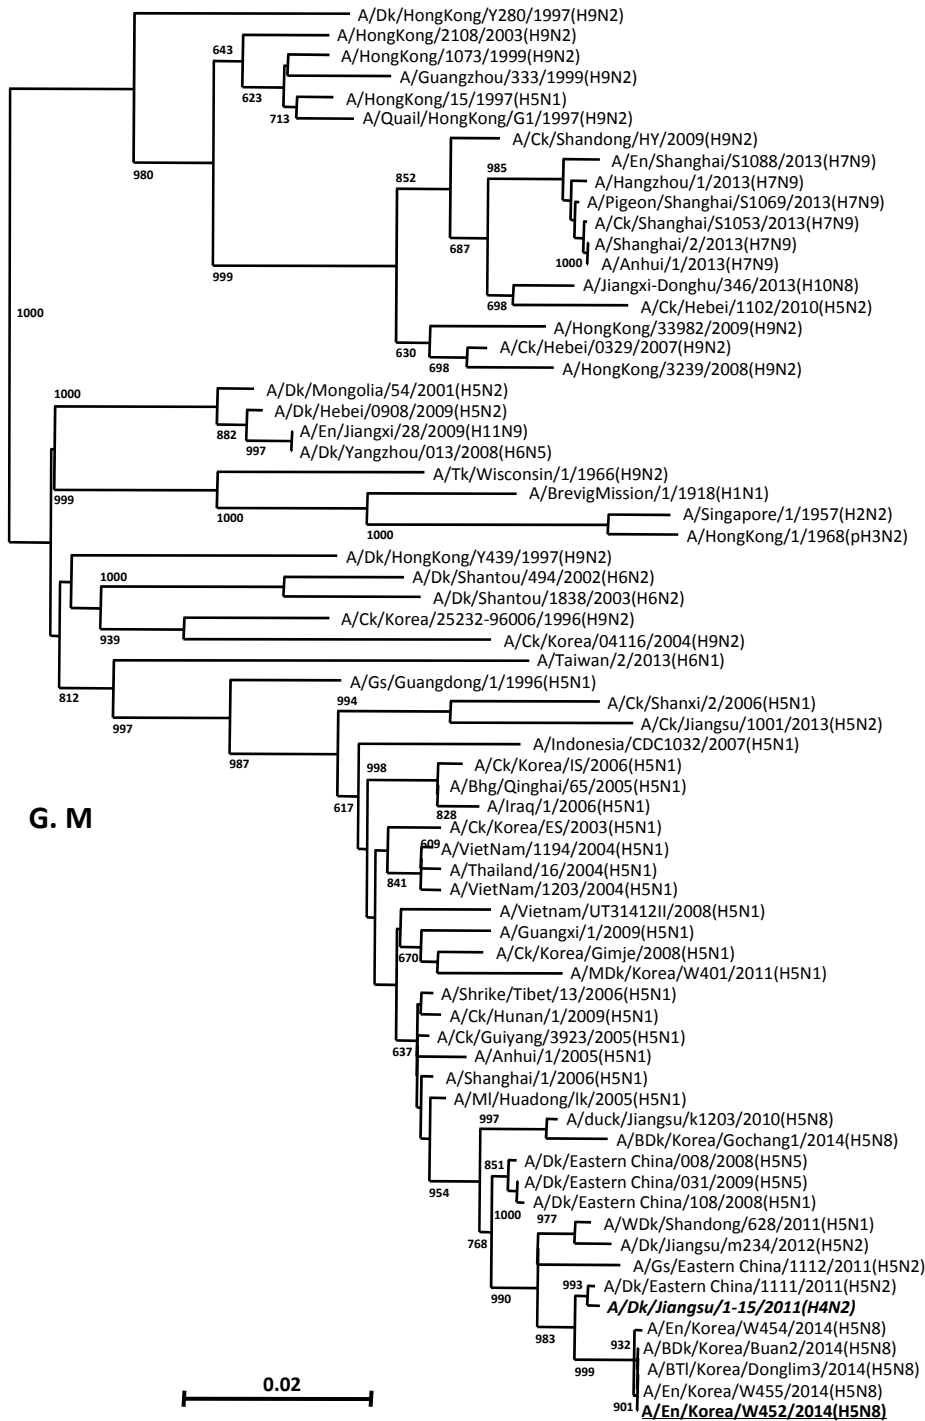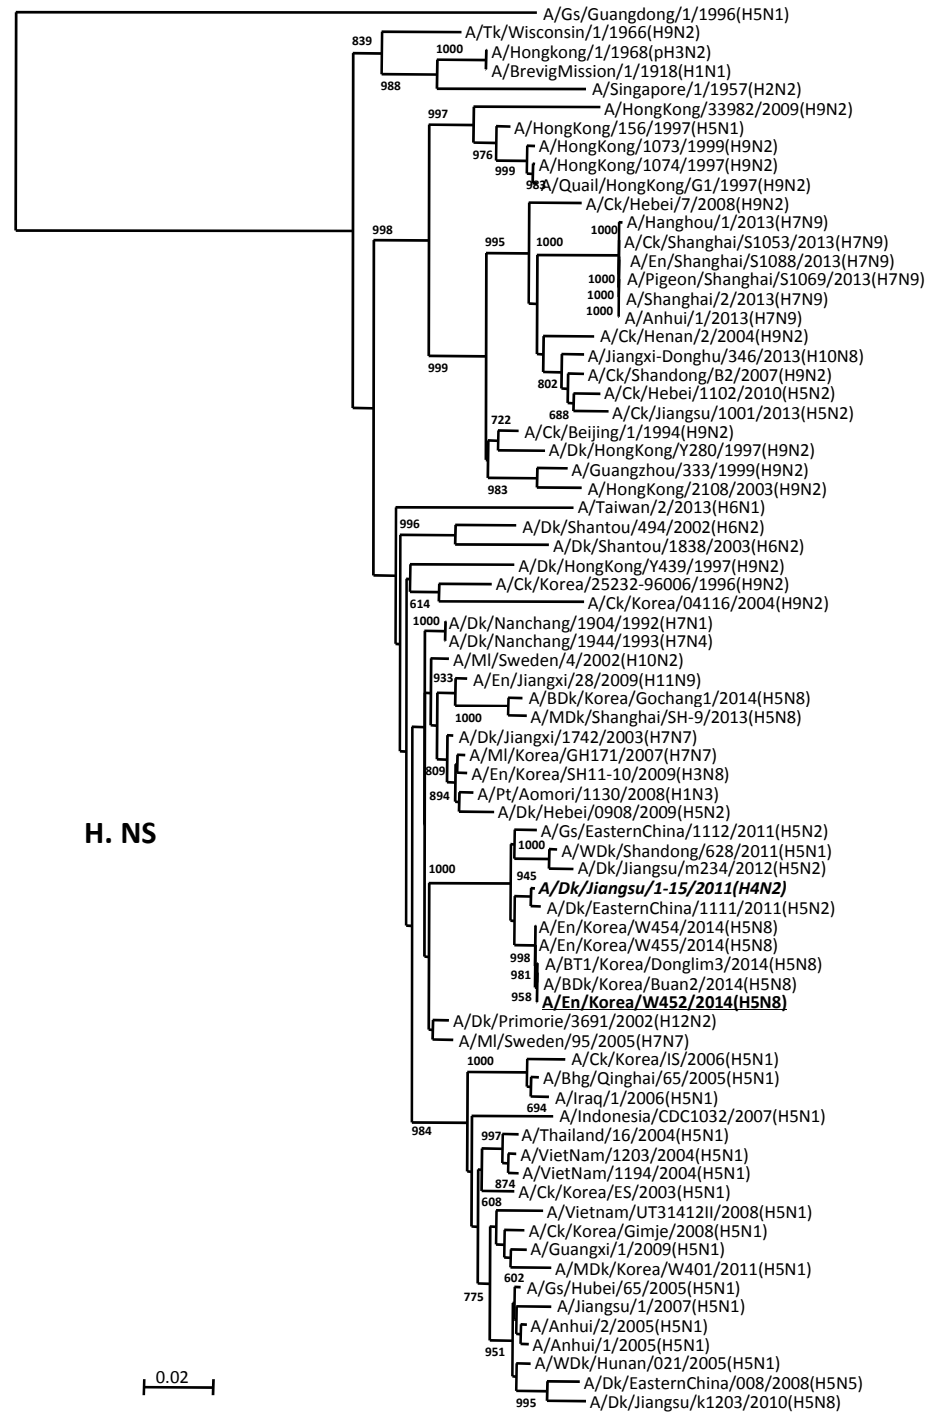

**Supplementary Figure S1 Phylogenetic trees based on the full-length nucleotide sequences of the surface glycoprotein genes *HA* and *NA* (A-B) and internal genes *PB2*, *PB1*, *PA*, *NP*, *M*, and *NS* (C-H) of MDk/W452(H5N8).** Phylogenetic trees were generated from published sequences available in GenBank by using the Meg Align function of DNASTar 5.0, aligned and bootstrapped in Clustal X [44], and then viewed in NJ plot [45]. The scale represents the number of substitutions per nucleotide. Bootstrap values  $\geq 60\%$  from 1000 bootstrap replicates performed to assign confidence to the grouping.
