# Supplementary material for: Pathobiological features of a novel, highly pathogenic avian influenza A(H5N8) virus
Source: PubMed Central journal article supplement — Emerg Microbes Infect. 2014 Oct 22;3(10):e75–. doi: 10.1038/emi.2014.75 (PMC4217095; doi:10.1038/emi.2014.75), 2014-10-22
Supplement: emi201475x9.pdf [file emi201475x9.pdf]

**A. En/W149(H5N1)**

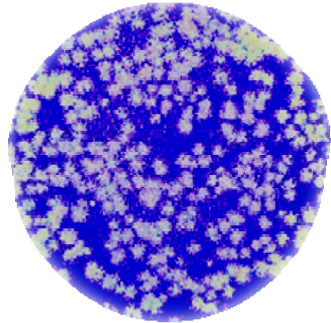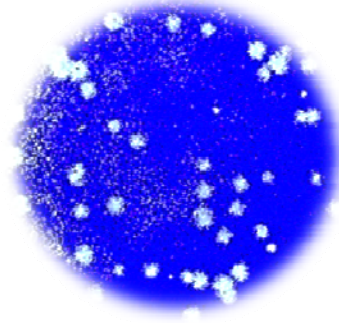

**B. MDk/W401(H5N1)**

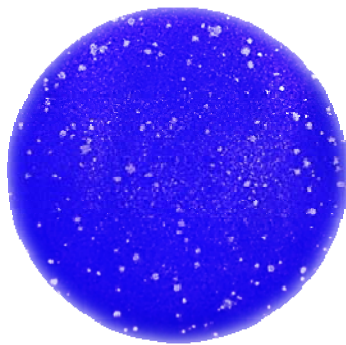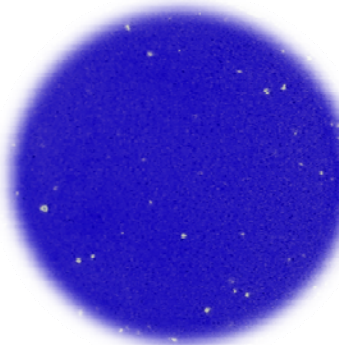

**C. MDk/W452(H5N8)**

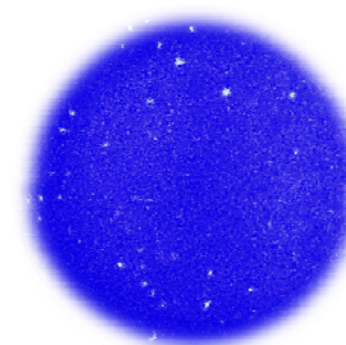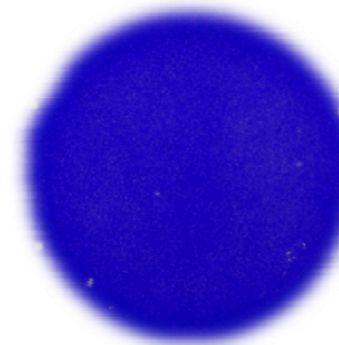

**Supplementary Figure S2 Virus plaque formation in MDCK cells.** Monolayers of MDCK cells were infected with 10-fold serial dilutions of En/W149(H5N1) **(A)**, MDk/W401(H5N1) **(B)**, or MDk/W452(H5N8) **(C)** virus in six-well plates. Plaques formed in the presence (left panels) or absence (right panels) of exogenous protease (TPCK-treated trypsin) were visualized by fixation and staining at 48 hpi [En/W149(H5N1)] or 72 hpi [MDk/W452(H5N8), MDk/W401(H5N1)].
