# Supplementary material for: Pathobiological features of a novel, highly pathogenic avian influenza A(H5N8) virus
Source: PubMed Central journal article supplement — Emerg Microbes Infect. 2014 Oct 22;3(10):e75–. doi: 10.1038/emi.2014.75 (PMC4217095; doi:10.1038/emi.2014.75), 2014-10-22
Supplement: emi201475x10.pdf [file emi201475x10.pdf]

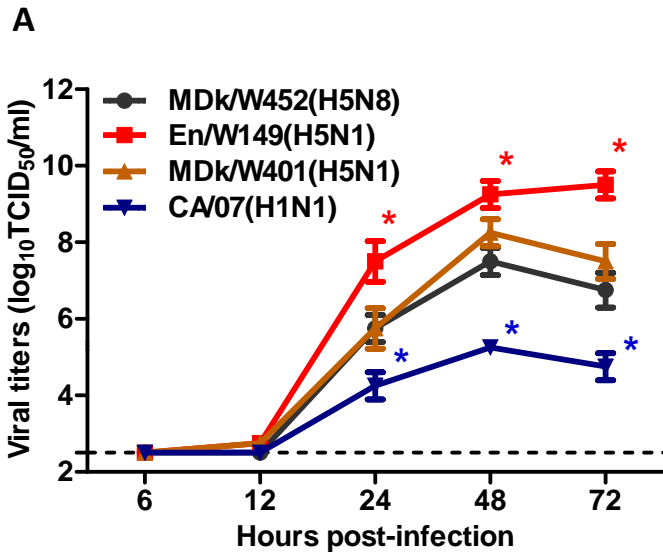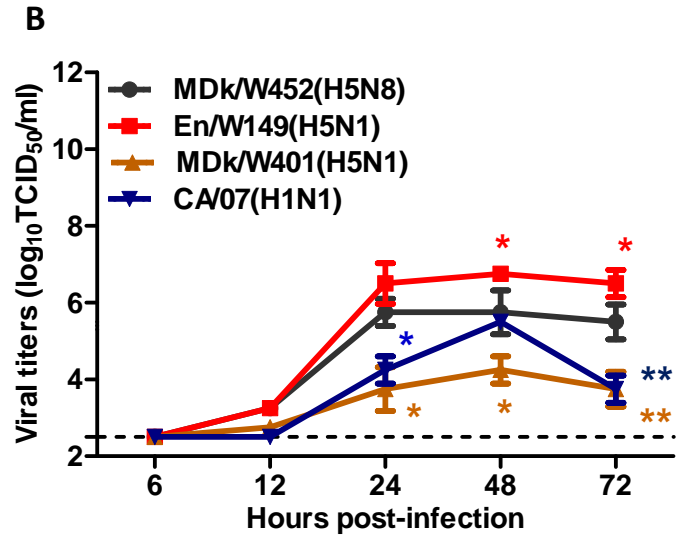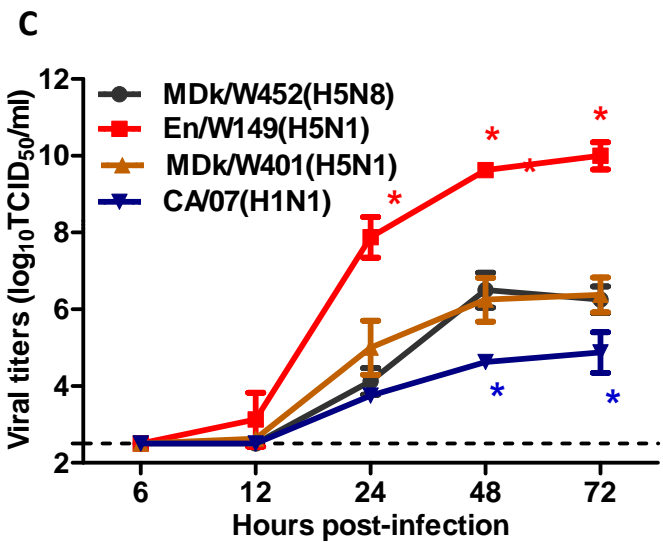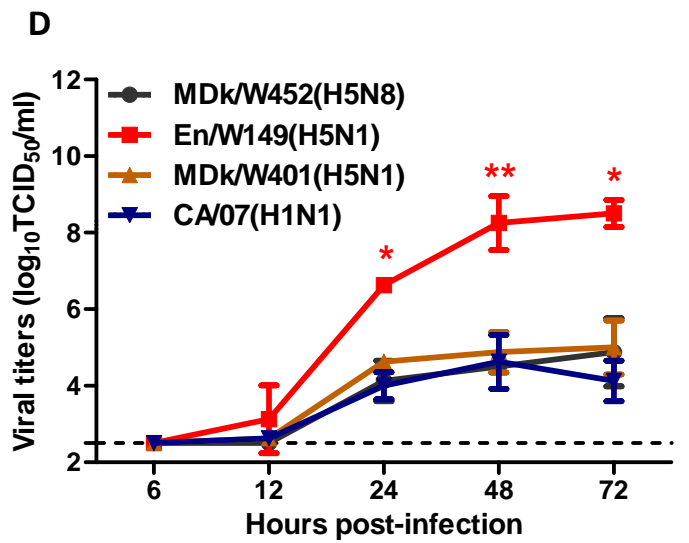

**Supplementary Figure S3 Growth kinetics of viruses in cultured cells.** Comparative growth curves in differentiated primary avian CELu **(A)** and CELi **(B)** cells, canine MDCK cells **(C)**, and human NHBE cells **(D)** after infection with MDk/W452(H5N8), En/W149(H5N1), MDk/W401(H5N1), or CA/07(H1N1) at an MOI of 0.001, 0.1 or 0.01, respectively. Viral growth was examined at optimal temperature (35°C) by collecting infected cell culture supernatants at indicated time-points. Error bars indicate standard deviations from three independent experiments performed in duplicates. [*P*<0.05; \*\**P*<0.001, relative to MDk/W452(H5N8)].
