# Supplementary material for: Pathobiological features of a novel, highly pathogenic avian influenza A(H5N8) virus
Source: PubMed Central journal article supplement — Emerg Microbes Infect. 2014 Oct 22;3(10):e75–. doi: 10.1038/emi.2014.75 (PMC4217095; doi:10.1038/emi.2014.75), 2014-10-22
Supplement: emi201475x11.pdf [file emi201475x11.pdf]

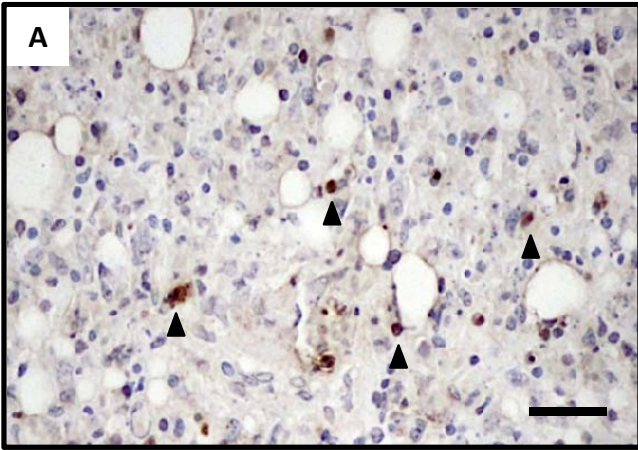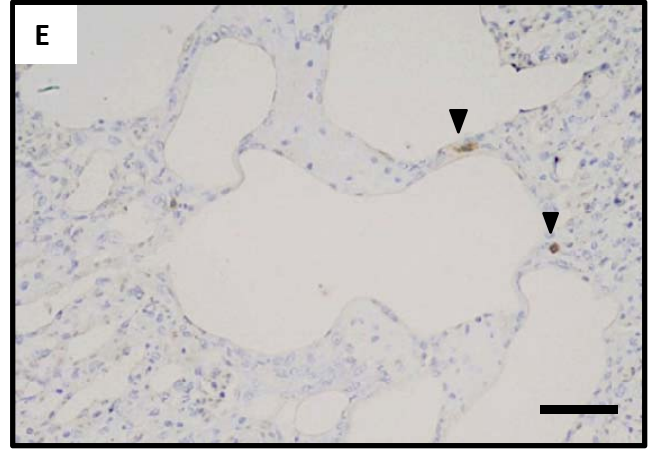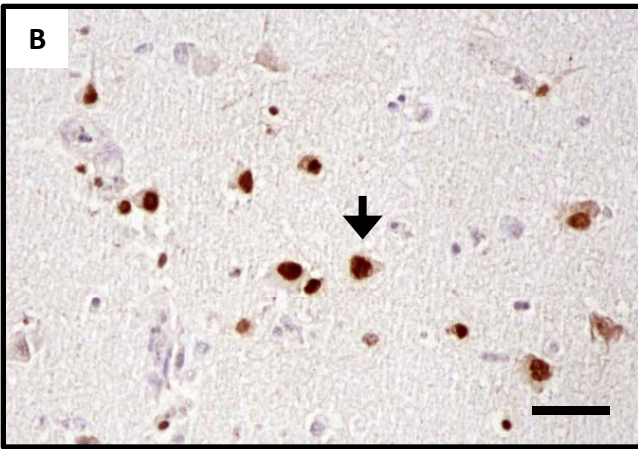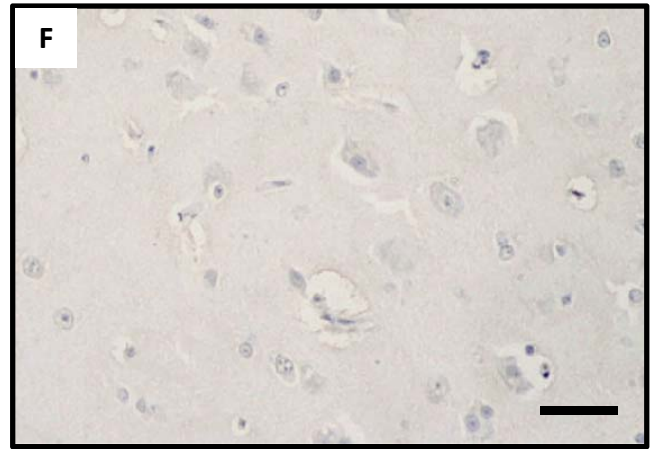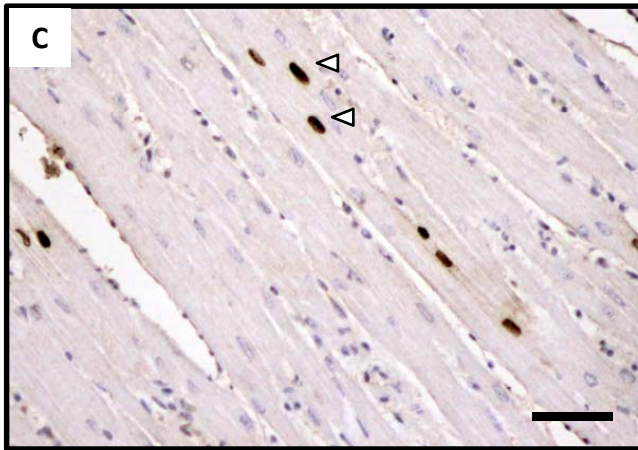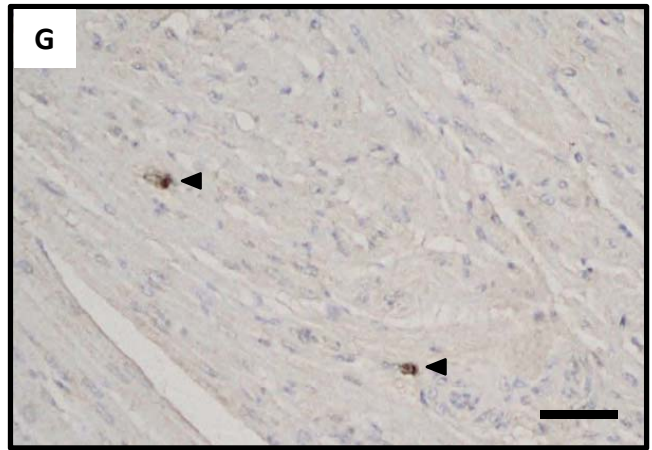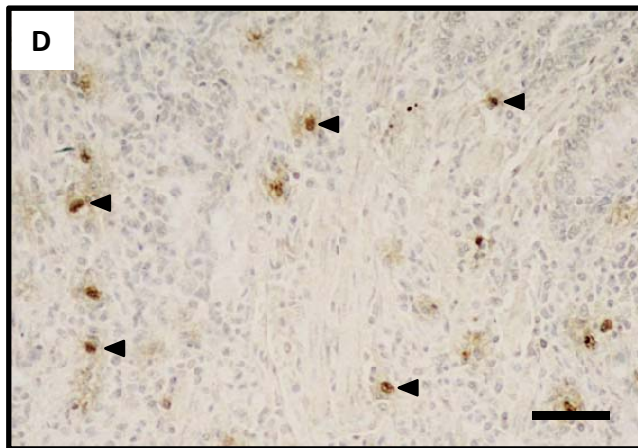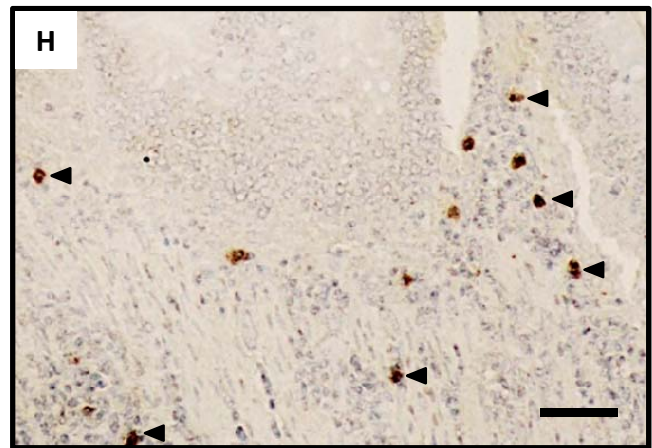

**Supplementary Figure S4 Immunohistochemical staining for influenza virus antigen in tissues of chickens (A-D) and ducks (E-H) infected with the HPAI A(H5N8) virus.** In chicken tissues, antigen-positive cells were detected alveolar macrophages (**A**, arrowheads) and mainly in neurons in cerebrum (**B**, arrow), nucleus of myocytes in heart (**C**, white arrows), and mononuclear phagocytic cells in intestine (**D**). In ducks, immunopositive cells were found in mononuclear phagocytic cells in the lung, (**E**, arrows), heart (**G**, arrows), and intestine (**H**) but lacking in the brain (**F**). Scale bars = 50  $\mu$ m.
