# Supplementary material for: Pathobiological features of a novel, highly pathogenic avian influenza A(H5N8) virus
Source: PubMed Central journal article supplement — Emerg Microbes Infect. 2014 Oct 22;3(10):e75–. doi: 10.1038/emi.2014.75 (PMC4217095; doi:10.1038/emi.2014.75), 2014-10-22
Supplement: emi201475x12.pdf [file emi201475x12.pdf]

**A. MDk/W452(H5N8)**

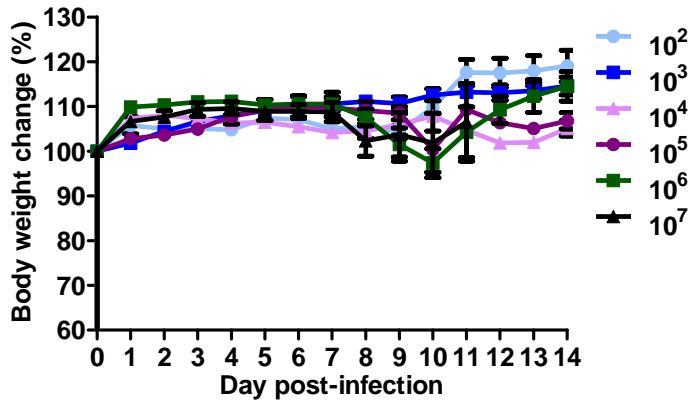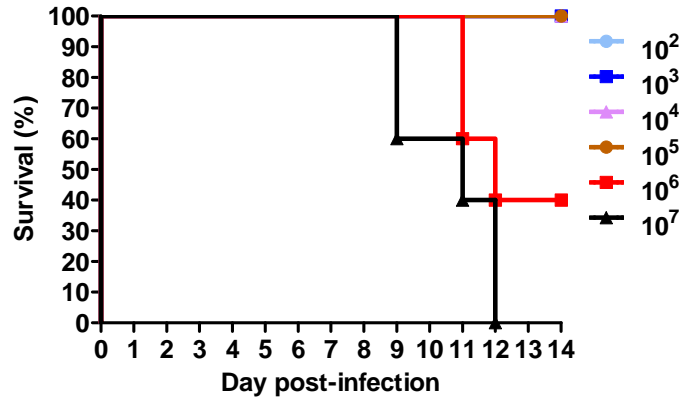

**B. En/W149(H5N1)**

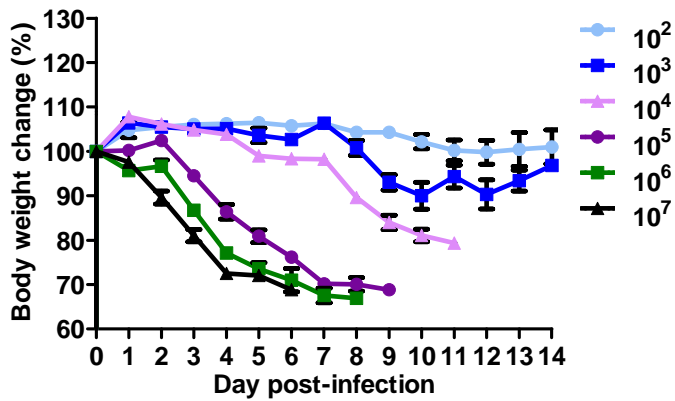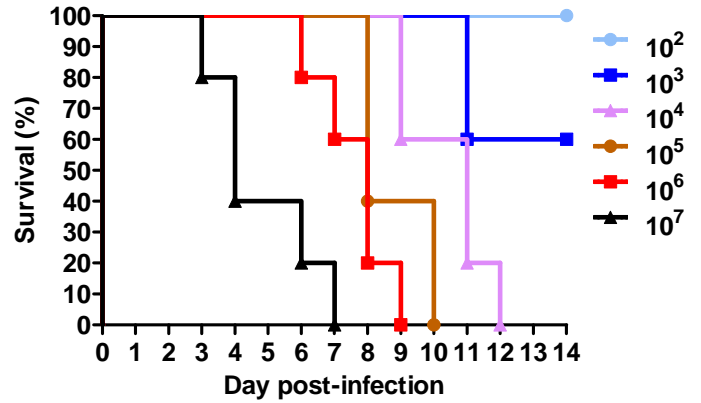

**C. MDk/W401(H5N1)**

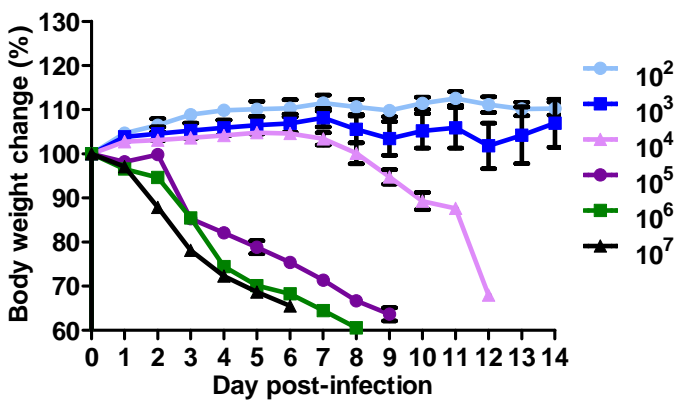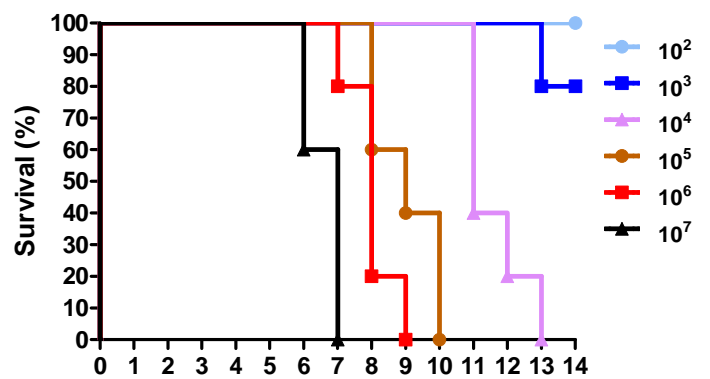

**Supplementary Figure S5 Pathogenicity in mice.** Groups of six mice were intranasally inoculated with  $10^2$  to  $10^7$  EID<sub>50</sub> in 50  $\mu$ L volume of MDk/W452(H5N8) **(A)**, En/W149(H5N1) **(B)**, or MDk/W401(H5N1) **(C)**. Body weight changes relative to initial values (live weight, left panel) and percentage survival (right panel) were monitored daily.
