# Supplementary material for: Pathobiological features of a novel, highly pathogenic avian influenza A(H5N8) virus
Source: PubMed Central journal article supplement — Emerg Microbes Infect. 2014 Oct 22;3(10):e75–. doi: 10.1038/emi.2014.75 (PMC4217095; doi:10.1038/emi.2014.75), 2014-10-22
Supplement: emi201475x13.pdf [file emi201475x13.pdf]

**A MDk/W452( H5N8)**

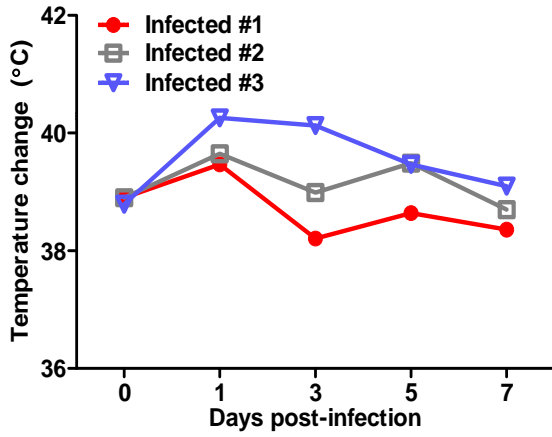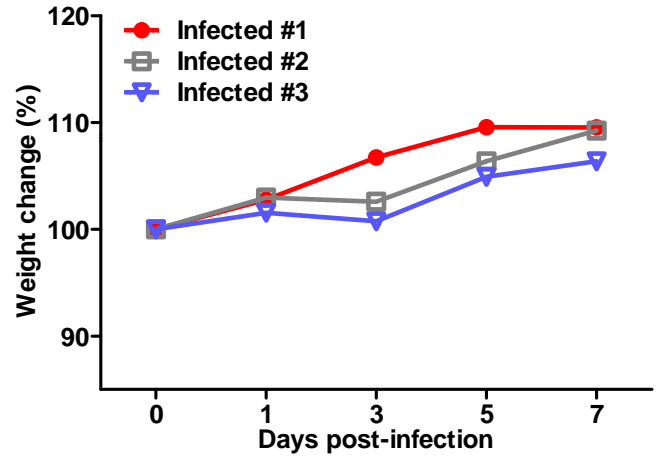

**B En/W149( H5N1)**

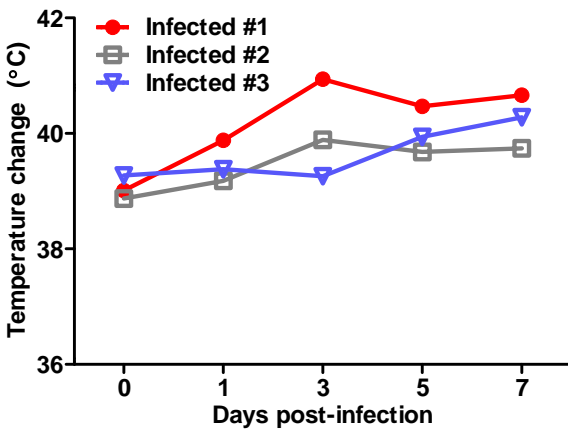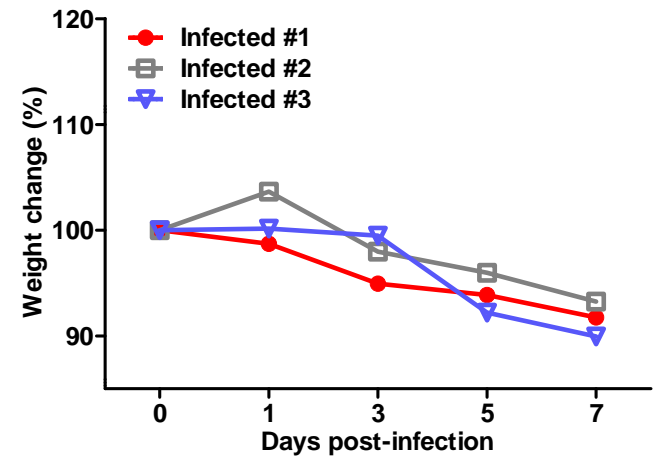

**C MDk/W401( H5N1)**

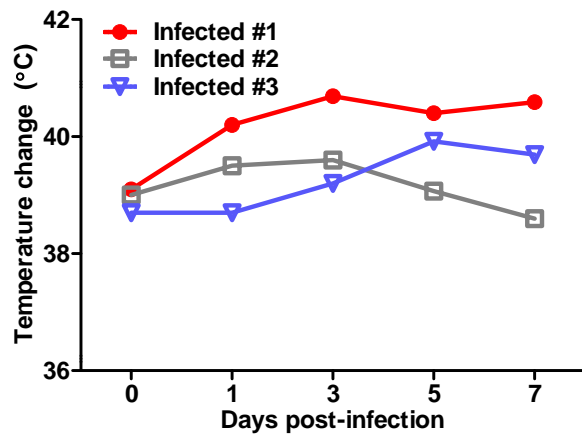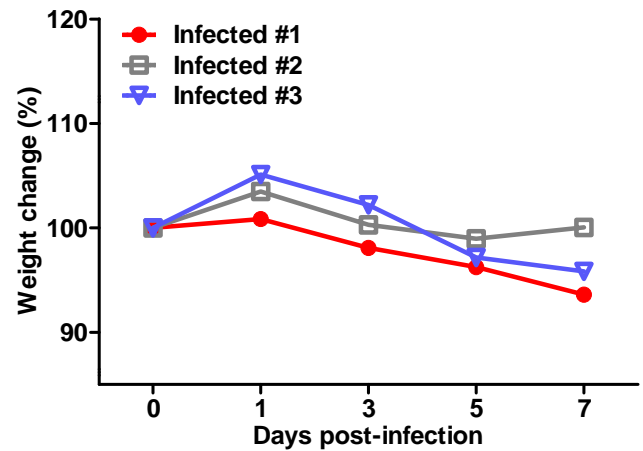

**Supplementary Figure S6 Body weights and temperatures of ferrets.** Three ferrets per virus group were inoculated intranasally with  $10^6$  EID<sub>50</sub> in a 1 mL volume of MDk/W452(H5N8) **(A)**, En/W149(H5N1) **(B)**, or MDk/W401(H5N1) **(C)**. Rectal temperatures and body weights were measured at 1, 3, 5, 7, 9, 11, and 14 dpi. Animal numbers correspond to those shown in Supplementary Figures 3D-3F and Supplementary Table S6.
