# Supplementary material for: Pathobiological features of a novel, highly pathogenic avian influenza A(H5N8) virus
Source: PubMed Central journal article supplement — Emerg Microbes Infect. 2014 Oct 22;3(10):e75–. doi: 10.1038/emi.2014.75 (PMC4217095; doi:10.1038/emi.2014.75), 2014-10-22
Supplement: emi201475x14.pdf [file emi201475x14.pdf]

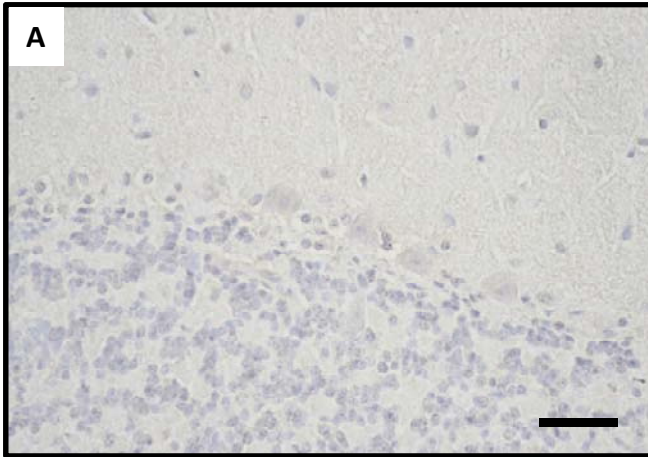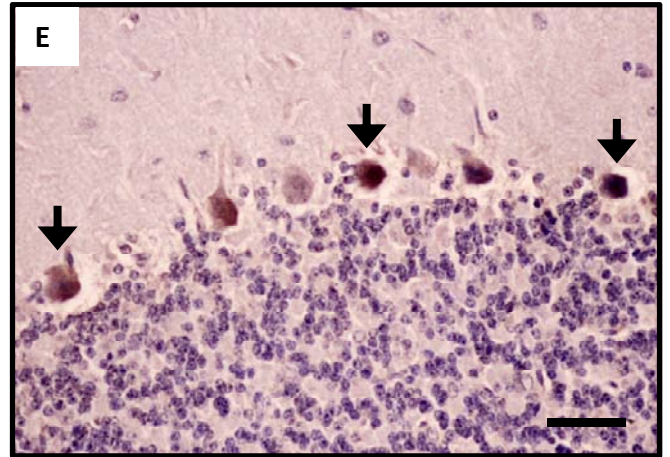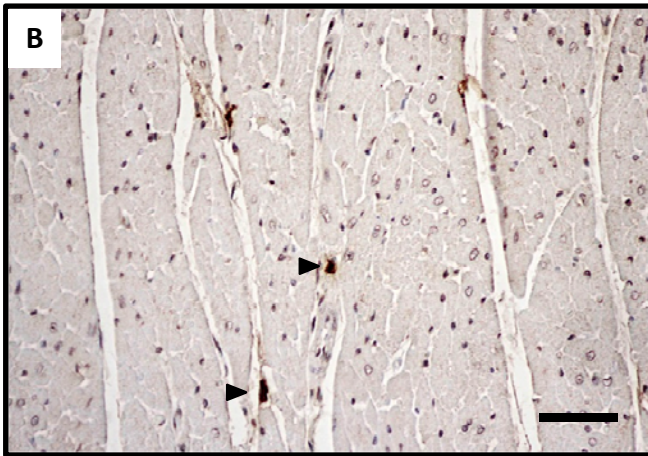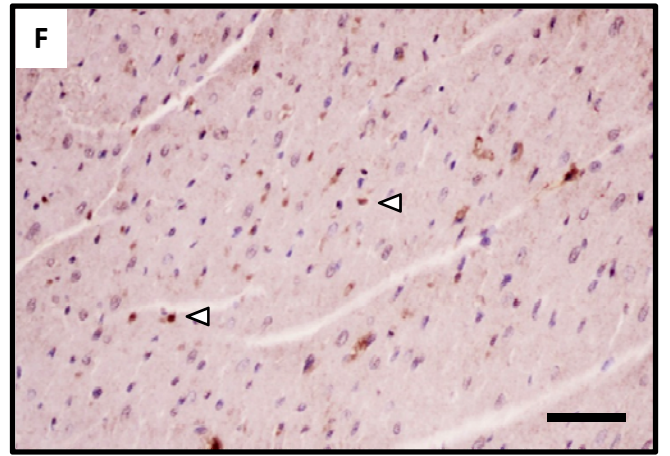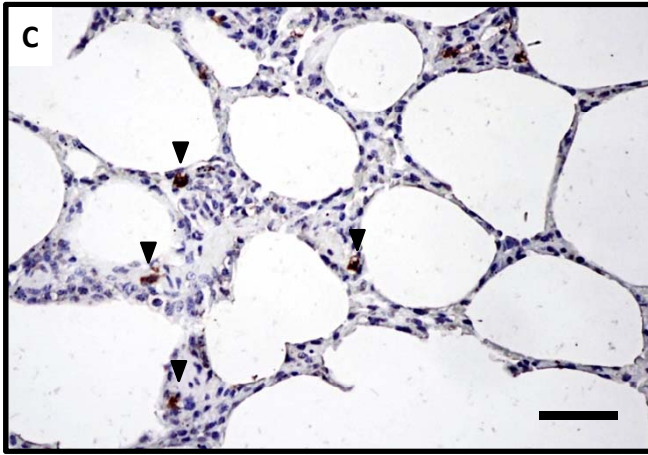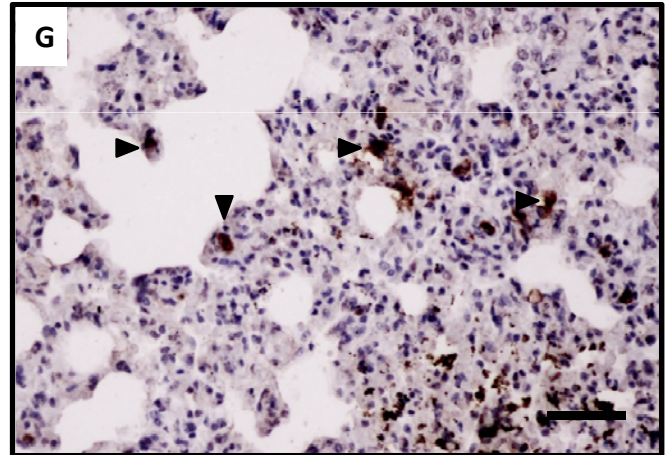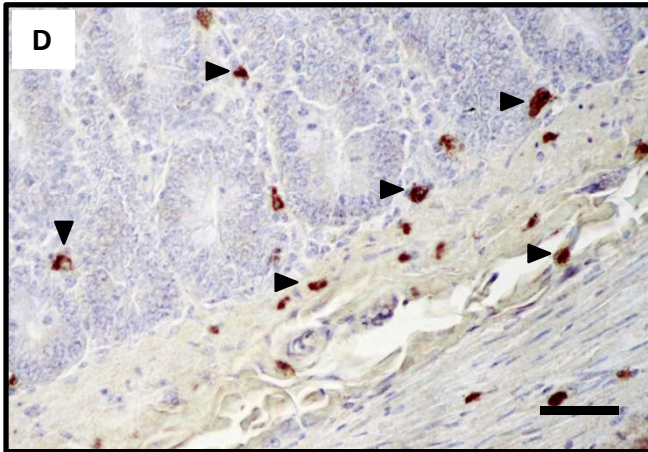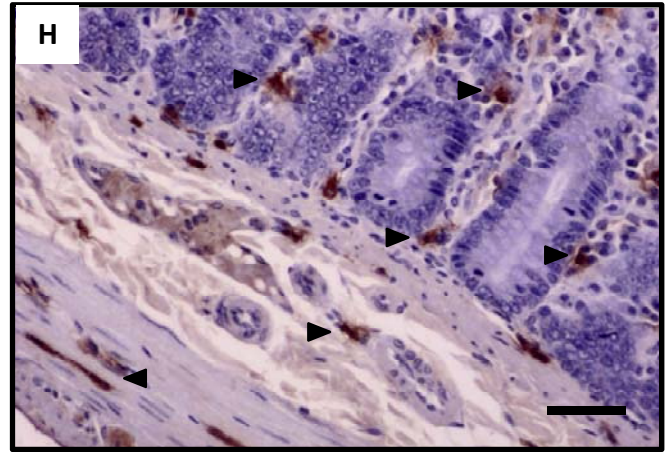

**Supplementary Figure S7 Immunohistochemical staining for influenza virus antigen in ferret tissues infected with the HPAI A(H5N8) virus (A-D) or HPAI H5N1 virus (E-H).** In A(H5N8) virus-infected ferrets, the influenza viral antigen was noted in mononuclear phagocytic cells in heart (**B**, arrows), lung (**C**, arrows), intestine (**D**), but not in brain (**A**). However, in A(H5N1) virus-infected ferrets, neurons in cerebellum (**E**, arrow) and midbrain were immunopositive in addition to the nucleus of some myocytes in heart (**F**, arrows), alveolar macrophages in lung (**G**, arrowheads), and mononuclear phagocytic cells in intestine (**H**). Scale bars = 50  $\mu$ m.
