# Supplementary material for: Pathobiological features of a novel, highly pathogenic avian influenza A(H5N8) virus
Source: PubMed Central journal article supplement — Emerg Microbes Infect. 2014 Oct 22;3(10):e75–. doi: 10.1038/emi.2014.75 (PMC4217095; doi:10.1038/emi.2014.75), 2014-10-22
Supplement: emi201475x15.pdf [file emi201475x15.pdf]

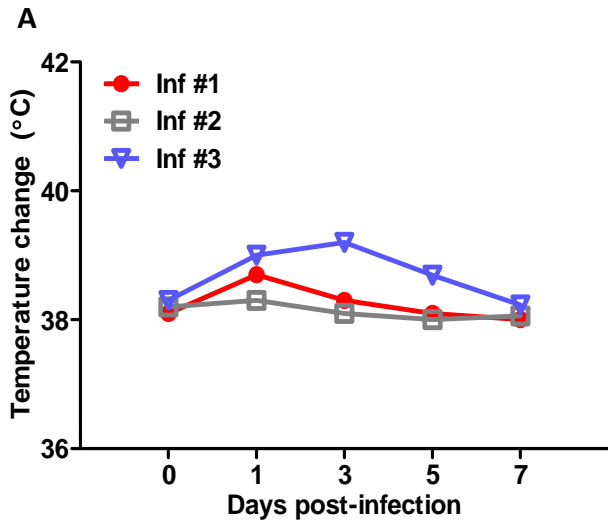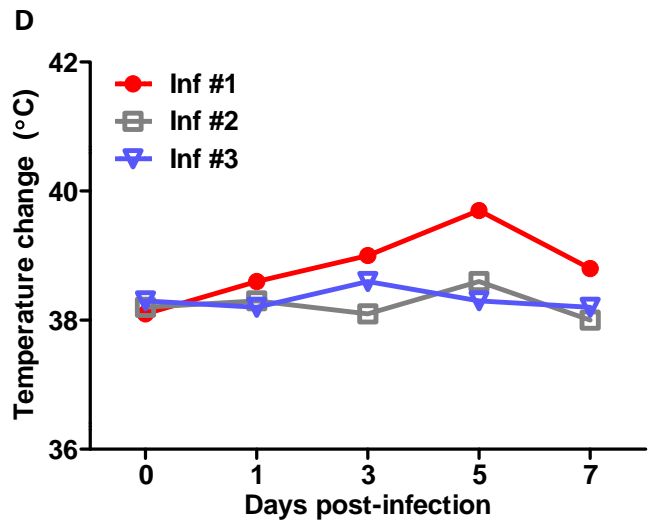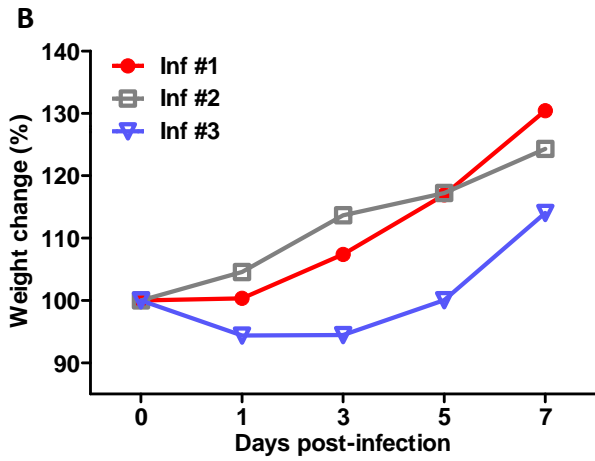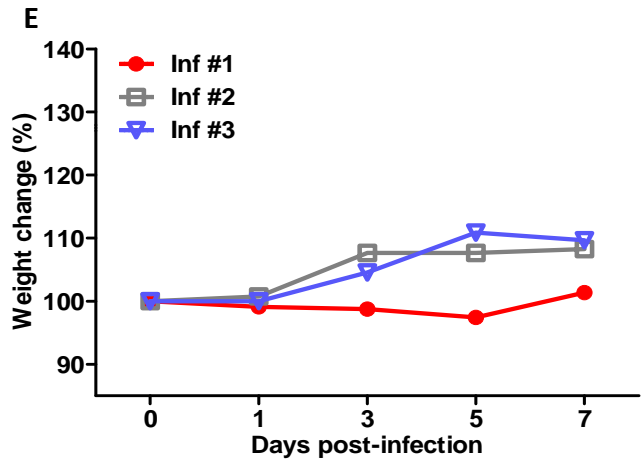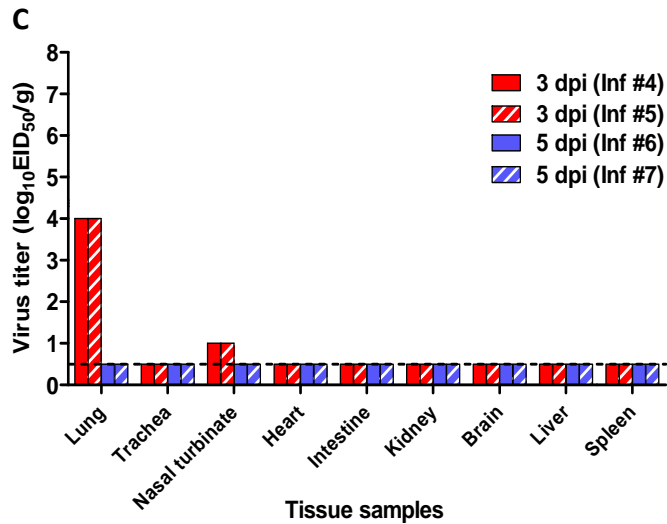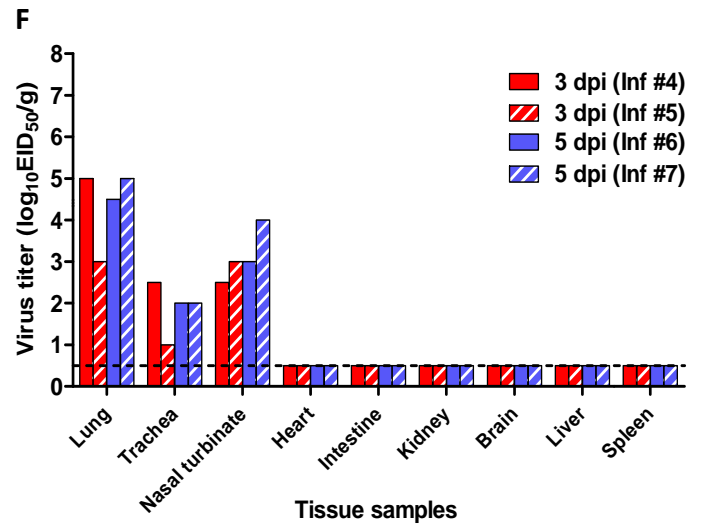

**Supplementary Figure S8 Body weights, temperatures, and tissue viral distribution of MDk/W452(H5N8) in dogs and cats.** Seven dogs (**A-C**) and cats (**D-F**) were inoculated with  $10^6$  EID<sub>50</sub> in a 1mL volume of the MDk/W452(H5N8) virus. Two members of each animal group were euthanized at 3 and 5 dpi for virologic characterization (**C** and **F**); the remaining three members were monitored for temperature and body weight changes (**A-B** and **D-E**).
