# Supplementary material for: Pathobiological features of a novel, highly pathogenic avian influenza A(H5N8) virus
Source: PubMed Central journal article supplement — Emerg Microbes Infect. 2014 Oct 22;3(10):e75–. doi: 10.1038/emi.2014.75 (PMC4217095; doi:10.1038/emi.2014.75), 2014-10-22
Supplement: emi201475x16.pdf [file emi201475x16.pdf]

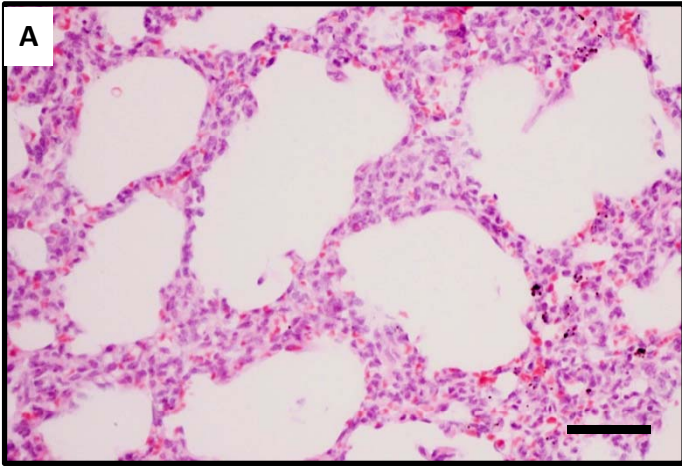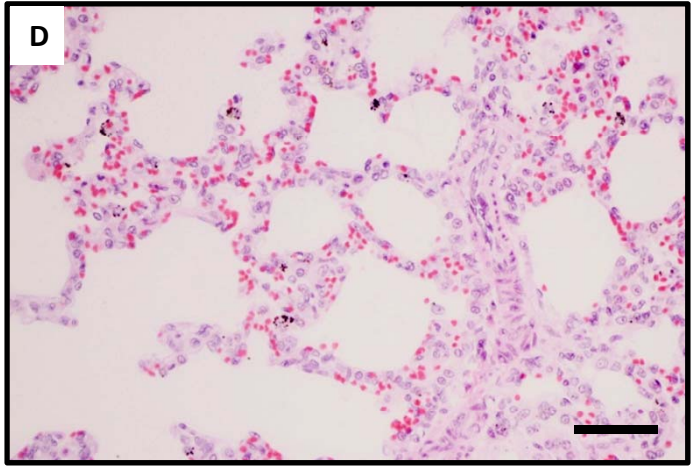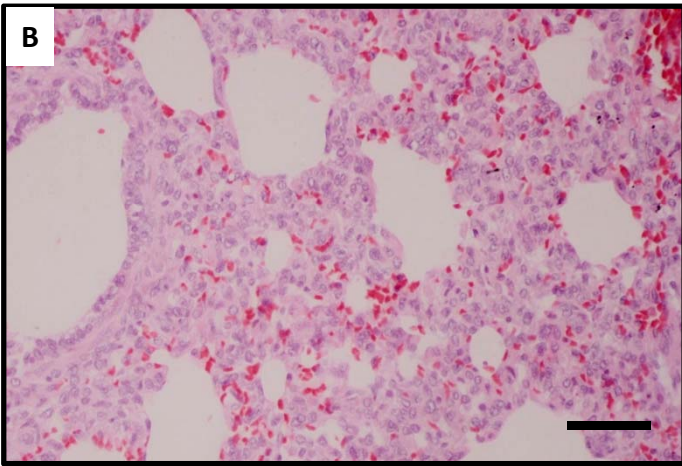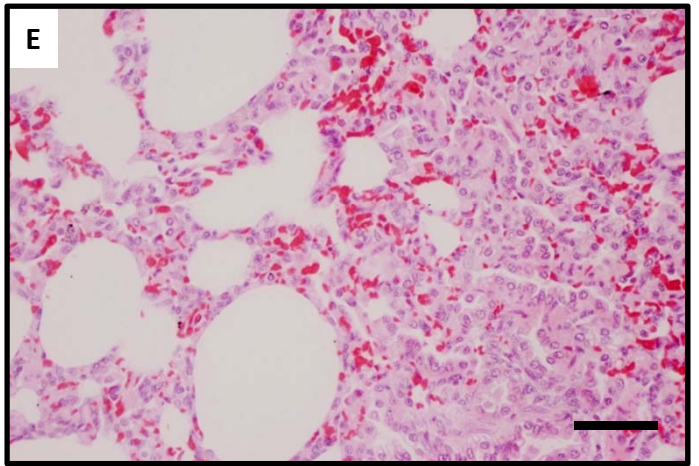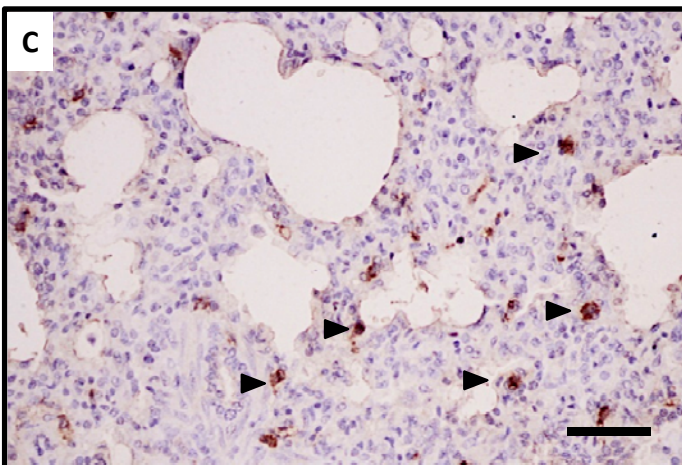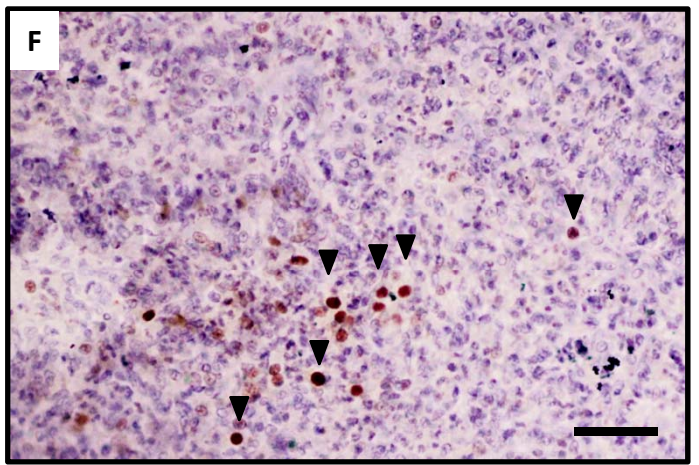

**Supplementary Figure S9 Histopathology and viral antigen detection in experimentally inoculated dogs (A-C) and cats (D-F).** Shown are representative lung histopathologic features at 3 (dog, **A**; cat, **D** and 5 dpi dog, **B**; cat, **E**, respectively). Multiple consolidated areas were observed in lungs of both animal models which were composed mainly of macrophages and pneumocytes. The severity of the lesions appeared to increase at the later time-point tested (5 dpi: dog, **B**; cat, **E**). Influenza virus NP antigens were detected in some alveolar macrophages of dog (**C**, arrows) and cat (**F**, arrows) at 5 dpi. Scale bars = 50  $\mu\text{m}$ .
